# Supplementary material for: iBio-GATS—A Semi-Automated Workflow for Structural Modelling of Insect Odorant Receptors
Source: MDPI journal article supplement (doi:10.3390/ijms25053055), 2024-03-06
Supplement: s1 [file s1]

## **iBio-GATS - a semi-automated workflow for structural modelling of insect odorant receptors**

by Vaanathi Chidambara Thanu, Amara Jabeen, and Shoba Ranganathan

### **SUPPLEMENTARY FIGURES AND TABLES**

**Figure S1.** Hydrophobicity plots for the *AbOrco* sequence with the template *MhOR5*

**Figure S2.** Helical wheel plots for the *AbOrco* sequence with the template *MhOR5*

**Figure S3.** iBio-GATS helix-wise alignment for the target sequence, *AbOrco* with the template, *MhOR5*

**Figure S4.** Full alignment for the target sequence, *AbOrco* with the template, *MhOR5*

**Figure S5.** Predicted models for *AbOrco* and *MhOR5*

**Table S1.** Helix definitions for *DmOR59b* (UniProt ID: Q9W1P8)

**Figure S6.** Helical wheel plots for *DmOR59b* compared with templates, *MhOR5* and *AbOrco*

**Figure S7.** Final pairwise alignment of *DmOR59b* with *MhOR5*

**Figure S8.** Predicted models for wild *DmOR59b*

**Figure S9.** Ramachandran plots

**Figure S10.** Binding pockets for predicted models of *DmOR59b* with DEET

**Figure S11.** Final pairwise alignment of *DmelOrco* with *AbOrco* (PDB ID:6C70)

**Table S2.** Helix definitions for *DmelOrco* (UniProt ID: Q9VNB5)

**Figure S12.** Hydrophobicity plots for the *DmelOrco* sequence with templates *AbOrco* and *MhOR5*

**Figure S13.** Helical wheel plots for the *DmelOrco* sequence compared templates, *AbOrco* and *MhOR5*

**Figure S14.** Structural overlay of predicted *DmelOrco* model with its template *AbOrco*.

**Figure S15.** RMSD plots of all four *DmelOrco* complexes over 100ns of MD simulations

**Figure S16.** The structure-derived sequences of the template structures

**Table S3.** Helix positions for *AbOrco* (PDB ID:6C70)

**Table S4.** Helix positions for *MhOR5* (PDB ID:7LIG).

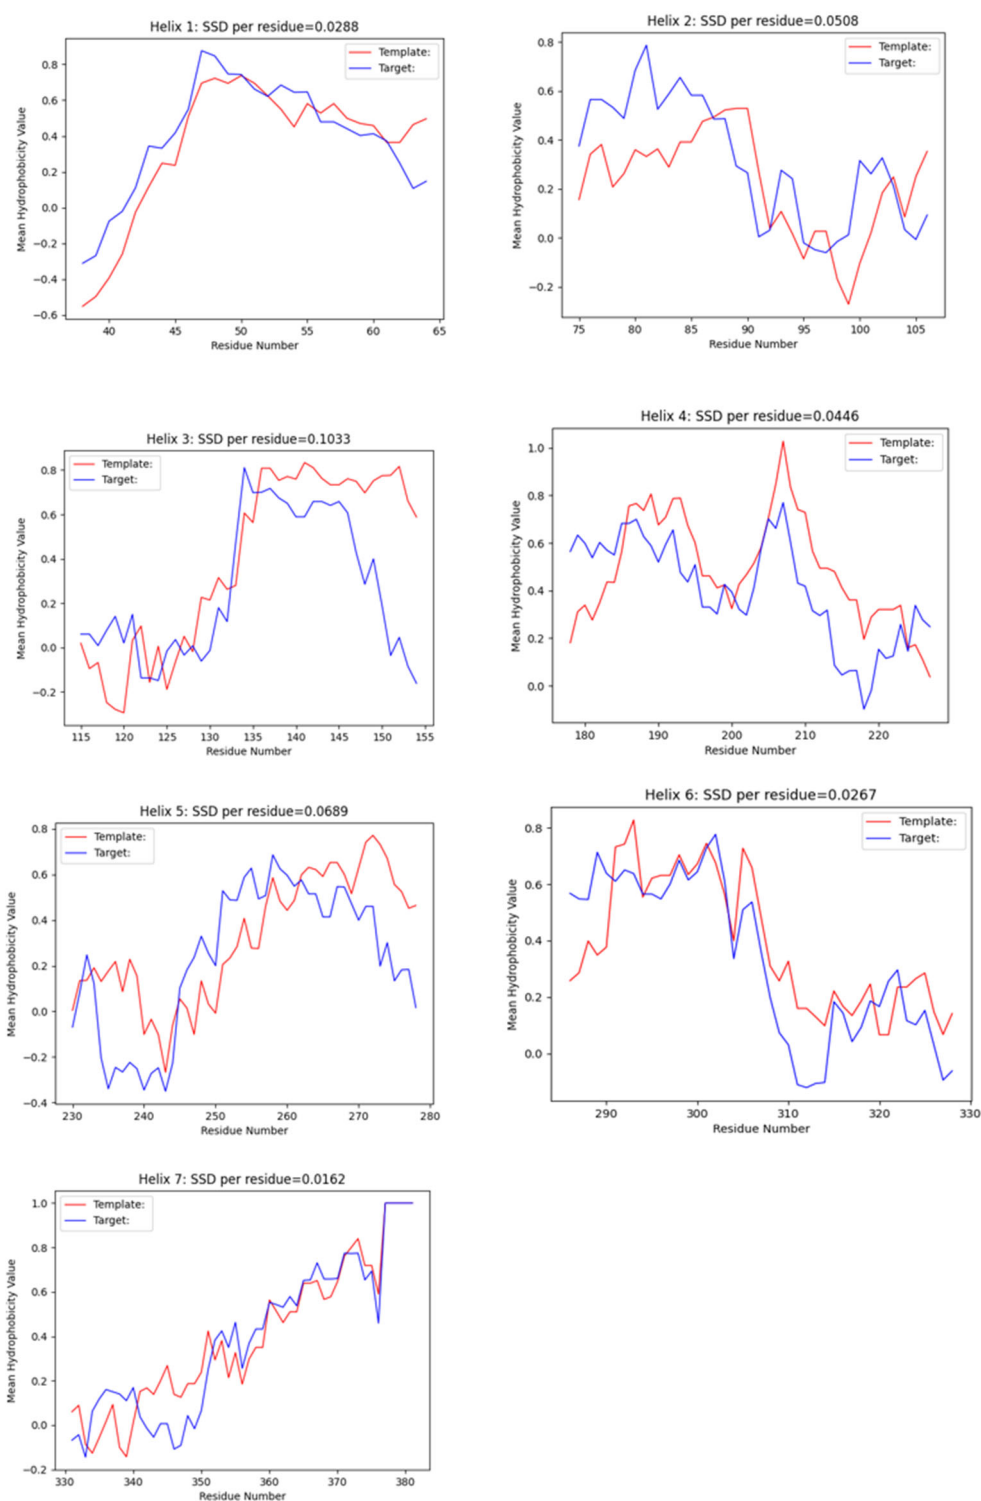

**Figure S1.** Hydrophobicity plots for the *AbOrco* sequence with the template *MhOR5*. Template PDB ID:7LIG .

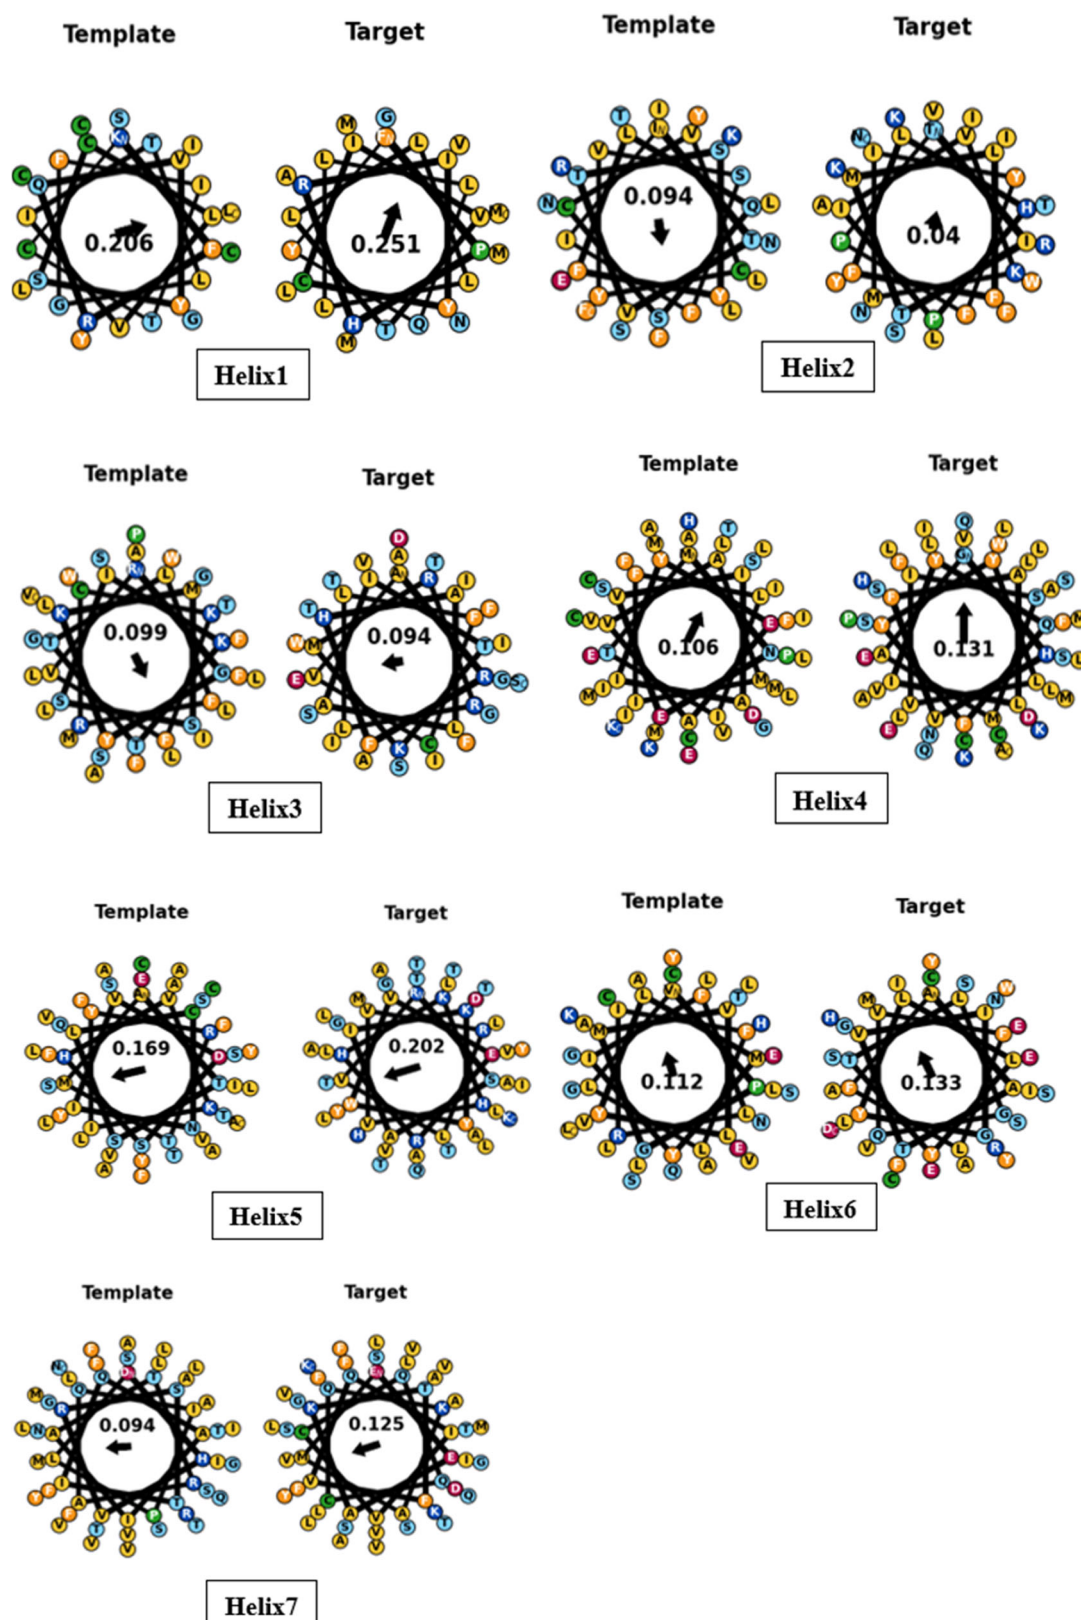

**Figure S2.** Helical wheel plots for the *AbOrco* sequence with the template *MhOR5*. Template PDB ID:7LIG.

```

Helix1
Template: KFRQVYSCLVITLGFITCSCYICGLCL
Target:   FPHRIYCIIVTLLLLLQYGMMAVNLM

Helix2
Template: ITVTSYFLQSCVCYVSFIINSRKLETLFNYLF-
Target:   TITMLFFLHPIVKMIYFPVRSKIFYKT LAIWN

Helix3
Template: RGYKMSSIKTTLFRCKFVAFSLGILSFFGWLMTLLPLAV
Target:   -ARFHALAITKMRRLLFCVAGATIFSVISWTGITFIEDS-

Helix4
Template: MNEVIAIYEAVAMIFLITAPMSSDIMFCVLMIFIVEHLKCLGMAIECTLK---
Target:   GHVFALIYQFYLVISMAVSNLDFCSWLLFACEQLQHLKAIMKPLMELSA

Helix5
Template: ATSLCNIVDSHVKIYRTMEIVQSVYSSYFATLFFTSCLAVCALAYFLAA
Target:   RSAIKYWVERHKHVRLVTAVGDAYGVALLHMLTTTITLTLAYQATK

Helix6
Template: VPGMVLYLMIYIFLRIFLLCLLATEVAEQGLNLCHAGYSSKLVL
Target:   AATVIGYLLYTLGQVFLFCIFGNRLIEESSVMEAAYSCHWYD

Helix7
Template: DHVRSTIQAIATRAQIPLSITGARFFT VNLSFLASMAGVMLTYFIVLLQVN
Target:   EEAKTFVQIVCQCQKAMSISGAKFFT VSLDLFASVLGAVVTYFMVLVQLK

```

**Figure S3.** iBio-GATS helix-wise alignment for the *AbOrco* target, with the, *MhOR5* template.

```

>Pl;Template
structureX:7LIG:: :: :: 0.00: 0.00
DDYIHLR-KWI-K-RIGIILRISGHW--PF--R-LPHEK--R---N---Q-HKSKFRQVYSCLVITLGFITCSCYICGLC
LSES--IAQALN---NITVTSYFLQSCVCYVSFIINSRKLETLFNYLF-ENEVVGCP-----RGYKMSSIKTTLFRCK
FVAFSLGILSFFGWLMTLLPLAVLV--V-D-QT-S--L---RF--VEAW-YPFDT-TTSPMNEVIAIYEAVAMIFLIT
APMSSDIMFCVLMIFIVEHLKCLGMAIECTLK-----G-----
----D-----ATSLCNIVDSHVKIYRTMEIVQSVYSSYFATLFFTSCLAVCALAY
FLAATSTS---FTRVPGMVLYLMIYIFLRIFLLCLLATEVAEQGLNLCHAGYSSKLVLASDHVRSTIQAIATRAQIPLSIT
GARFFT VNLSFLASMAGVMLTYFIVLLQVN*
>Pl;Target
sequence:6C70:: :: :: 0.00: 0.00
---GPGRAK--FKHQ-G--L-V-AD-LLP-NIRVM-QG-VGHFMFNYYSEGKK-FPHRIYCIIVTLLLLLQYGMMAVNLM
M-ESDDV-D--DLTANTITMLFFLHPIVKMIYFPVRSKIFYKT LAIWNPN---S-HPLFAESN-ARFHALAITKMRRLL
FCVAGATIFSVISWTGITFIEDS--VKRITDPETNETTIIPR-LMIRT-FYPFNAMSGA-GHVFALIYQFYLVISMA
VSNLDFCSWLLFACEQLQHLKAIMKPLMELSATLDTVPNSGELFKAGSADHLRESQGVQPSGNGDNVLDVLRGIY
SNRQDFTATFRPTAGTTFNNGVGPNGLTKKQEMLVRSIAIKYWVERHKHVRLVTAVGDAYGVALLHMLTTTITLTLAY
QATK-VNGVNVY--AATVIGYLLYTLGQVFLFCIFGNRLIEESSVMEAAYSCHWYDGSEAKTFVQIVCQCQKAMSIS
GAKFFT VSLDLFASVLGAVVTYFMVLVQLK*

```

**Figure S4.** Full alignment for the *AbOrco* sequence, with the *MhOR5* template.

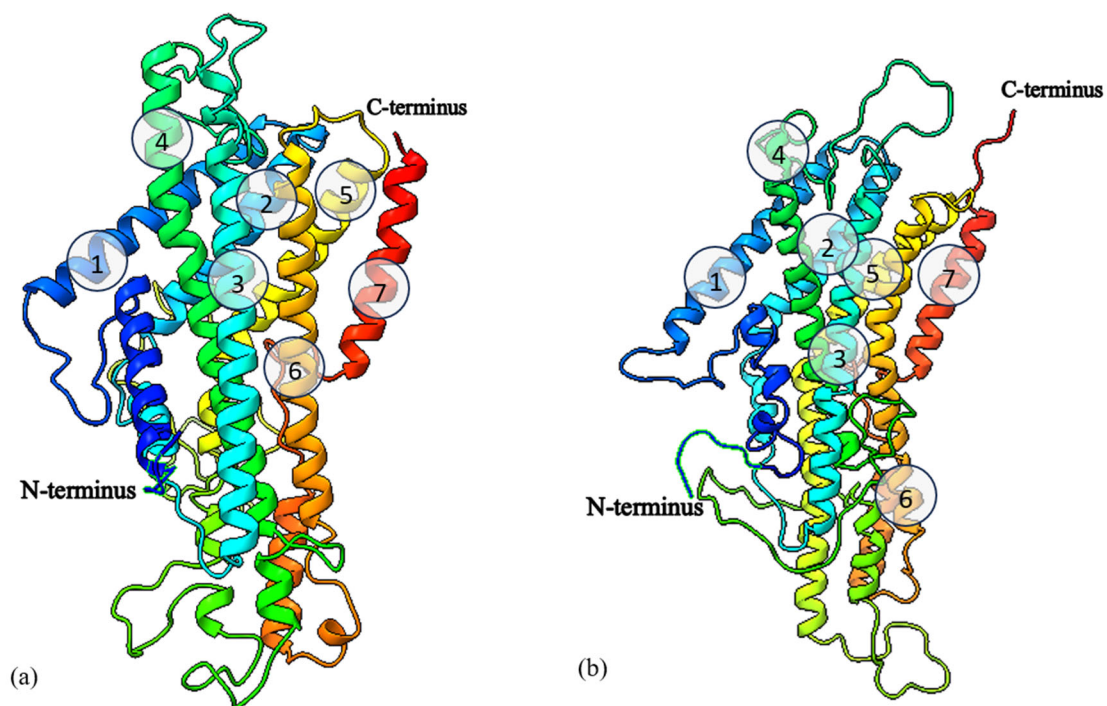

**Figure S5.** Predicted models for *AbOrco* and *MhOR5*. (a) The model predicted for *AbOrco* sequence using the template *MhOR5* and (b) the model predicted for *MhOR5* using the template *AbOrco*. The seven helices, C-terminus and N-terminus are labelled.

**Table S1. Helix definitions for *DmOR59b* (UniProt ID: Q9W1P8)**

| <b>Helix</b> | <b>Helix start</b> | <b>Helix end</b> | <b>Centre residue</b> |
|--------------|--------------------|------------------|-----------------------|
| 1            | 47                 | 73               | Y60                   |
| 2            | 88                 | 119              | F104                  |
| 3            | 121                | 160              | S146                  |
| 4            | 183                | 232              | D206                  |
| 5            | 242                | 290              | S267                  |
| 6            | 297                | 339              | L321                  |
| 7            | 342                | 392              | F367                  |

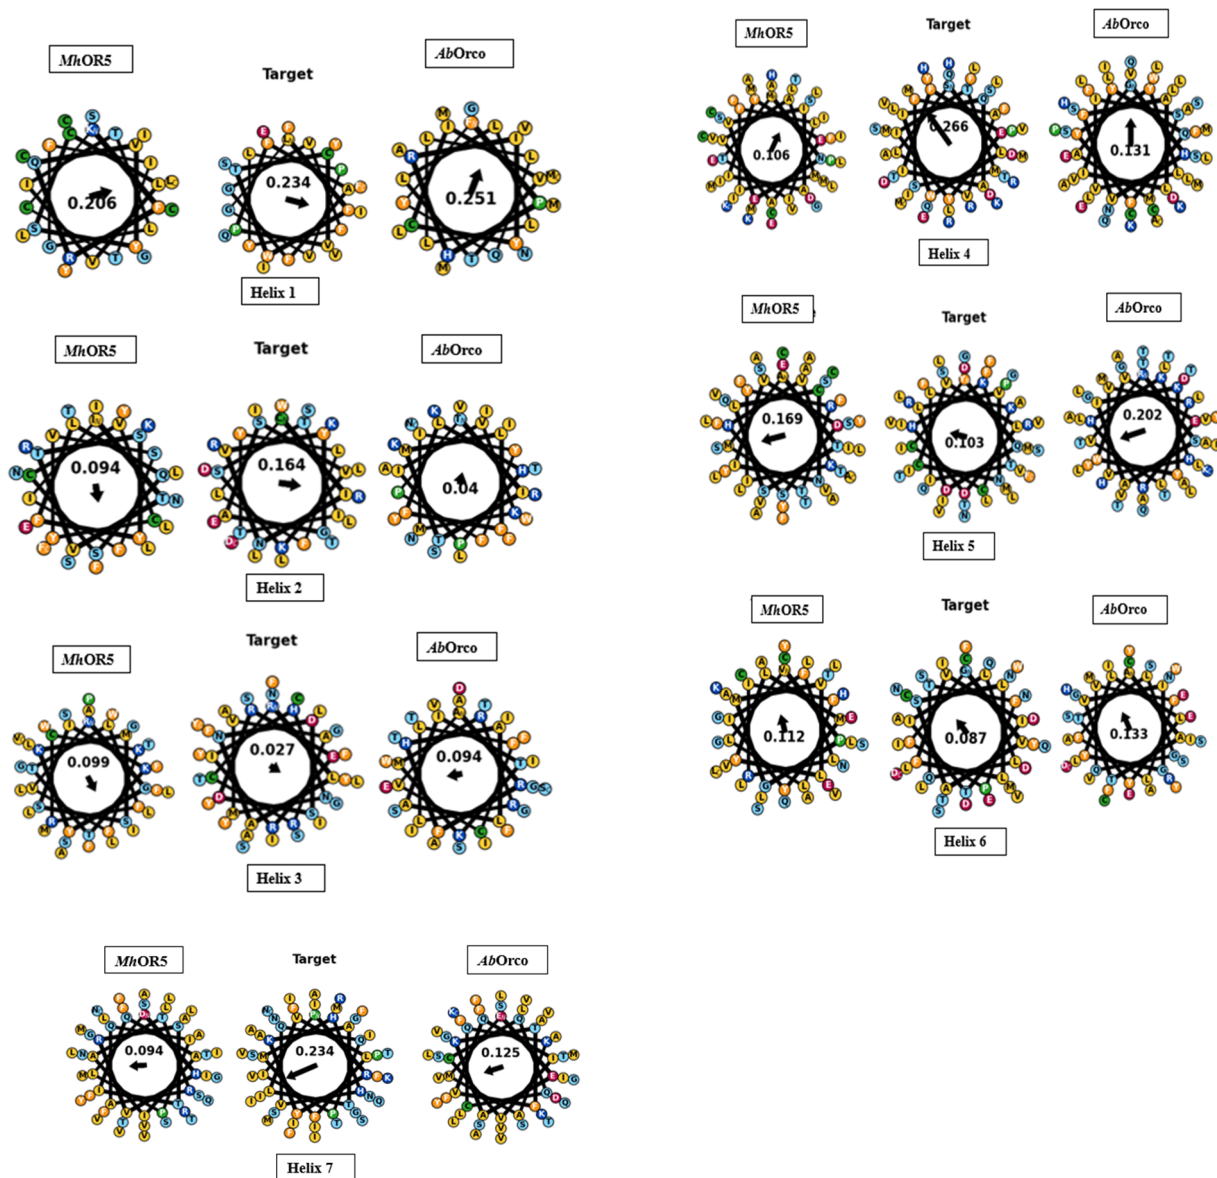

**Figure S6.** Helical wheel plots for *DmOR59b* compared with templates, *MhOR5* and *AbOrco*. The helical moments of *DmOR59b* are better aligned to those of *MhOR5* than those of *AbOrco*.



|               |                                                              |     |     |     |     |     |     |
|---------------|--------------------------------------------------------------|-----|-----|-----|-----|-----|-----|
|               | 10                                                           | 20  | 30  | 40  | 50  | He1 | 60  |
| 7LIG_1Chain_A | -----DDYIHLRKWIKRIGIILRISGHWPFRLPHEKRNQHKSKFRQVYSCLVI        |     |     |     |     |     |     |
| NP_523822.1od | MAVFKLIKPAPLTEKVQSRQGNIIYLRAMWLIGWIP---PKEGVLRYVYLFWTCVPFAFG |     |     |     |     |     |     |
|               | 70                                                           | 80  | 90  | 100 | He2 | 110 | 120 |
| 7LIG_1Chain_A | TLGFITCSCYICGLCLS---ESIAQALNNITVTSYFLQSCVCVVSFIINSRKLETLFNY  |     |     |     |     |     |     |
| NP_523822.1od | VFYLPVGFIIISYVQEFKNFTPGFELTSLQVCINVGASVKSTITYLFLWRLRKTEILLDS |     |     |     |     |     |     |
|               | 130                                                          | 140 | 150 | He3 | 160 | 170 | 180 |
| 7LIG_1Chain_A | LFENEVVGCPRGYKMSSIKTTLFRCCKFVAFSLGILSFFGWLMTLLPLAVLVVDQTSRFR |     |     |     |     |     |     |
| NP_523822.1od | LDK-----RLANDSDRERIHNMAVRCNYAFLIYSFIYCGYAGSTFLSYALSGRPPWSV   |     |     |     |     |     |     |
|               | 190                                                          | 200 | He4 | 210 | 220 | 230 | 240 |
| 7LIG_1Chain_A | VEAWYPFDTTSPMNEVIAIYEAVAMIFLITAPMSSDIMFCVLMIFIVEHLKCLGMAIEC  |     |     |     |     |     |     |
| NP_523822.1od | YNPFIDWR-DGMGSLWIQAIFEYITMSFAVLQDQLSDTYPLMFTIMFRAHMEVLKDHVRS |     |     |     |     |     |     |
|               | 250                                                          | 260 | 270 | He5 | 280 | 290 | 300 |
| 7LIG_1Chain_A | TLKGD-----ATSLCNIVDSHVKIYRTMEIVQSVYSSYFATLFFTSCLAVCALAYFLA   |     |     |     |     |     |     |
| NP_523822.1od | LRMDPERSEADNYQDLVNCVLDHKTILKCCDMIRPMISRTIFVQFALIGSVLGLTLVNVF |     |     |     |     |     |     |
|               | 310                                                          | 320 | 330 | He6 | 340 | 350 | 360 |
| 7LIG_1Chain_A | ATSTSFTRVPGMVLVLMYIFLRIFLLCLLATEVAEQGLNLCHAGYSSKLVLASDHVRSTI |     |     |     |     |     |     |
| NP_523822.1od | FFS-NFWKGVASLLFVITILLQTFPFCYTCNMLIDDAQDLSNEIFQSNWVDAEPRYKATL |     |     |     |     |     |     |
|               | 370                                                          | 380 | 390 | He7 | 400 | 410 |     |
| 7LIG_1Chain_A | QAIATRAQIPLSITGARFFTVNLSFLASMAGVMLTYFIVLLQVN-----            |     |     |     |     |     |     |
| NP_523822.1od | VLFMHVQQPIIFIAGGIFPISMNSNITVAKFAFSIITIVRQMNLAEQFQ            |     |     |     |     |     |     |

**Figure S7.** Final pairwise alignment of *Dm*OR59b with *Mh*OR5. The AlignMe 1.2 output was edited manually to remove gaps in the helical regions using the MEGA 11 sequence viewer.



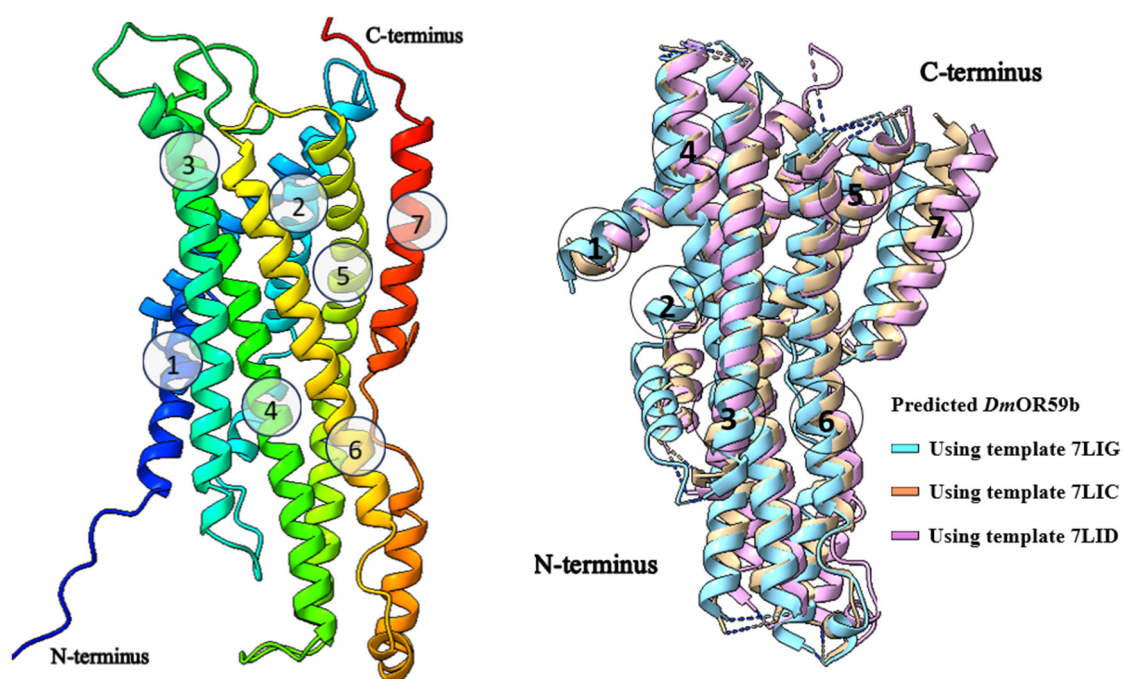

**Figure S8.** Predicted models for *DmOR59b* sequence. (a) The top predicted model for *DmOR59b* (WfWtOR59b) using the template *MhOR5* (PDB:7LIG). (b) Structural overlay of predicted models (showing only helices) of *DmOR59b* (WfWtOR59b) using all three templates of *MhOR5*. The seven helices are labelled.

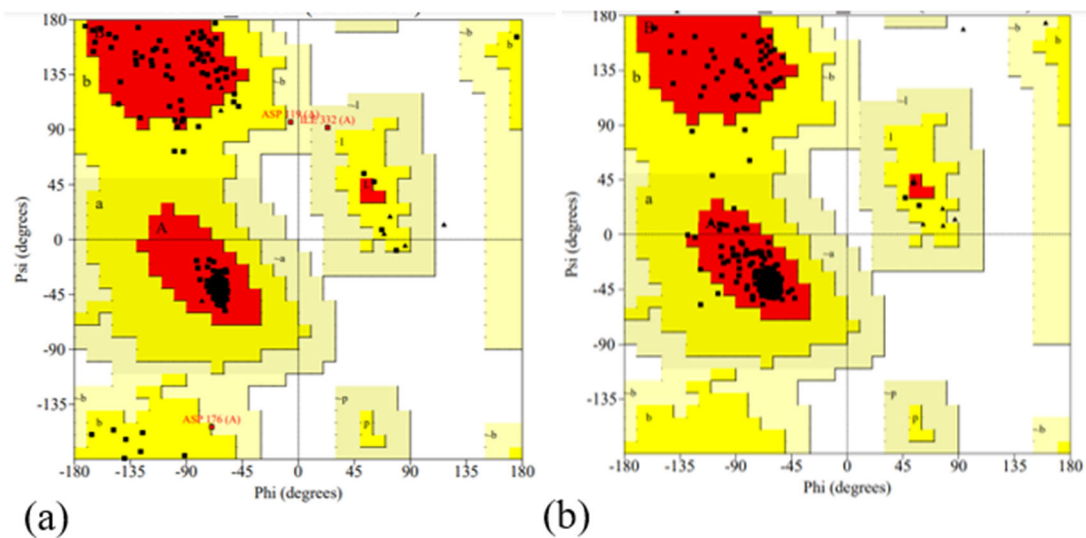

**Figure S9.** Ramachandran plots for *DmOR59b*. (a) iBio-GATS workflow model, WfWtOR59b and (b) AlphaFold2 model, AfWtOR59b.

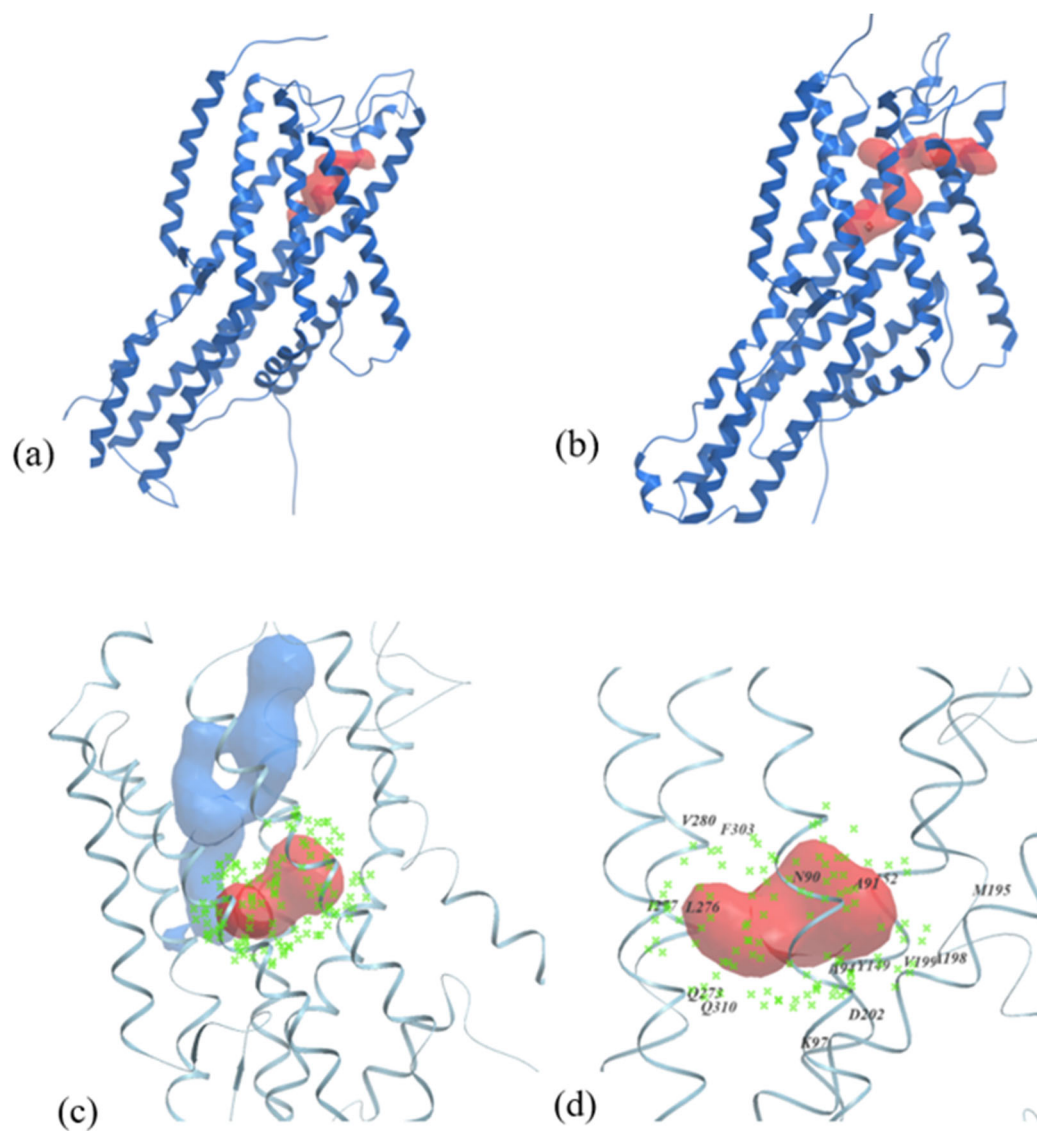

**Figure S10.** Binding pockets for predicted models of *DmOR59b* with DEET

The ICM binding pockets of the workflow (Wf) and Alpha Fold (Af) wild type (Wt) and mutant (Mt) models of *DmOR59b*. (a) WfWtOR59b, (b) WfMtOR59b, (c) AfWtOR59b and (d). AfMtOR59b.

|               |                                         |            |          |          |          |          |                            |
|---------------|-----------------------------------------|------------|----------|----------|----------|----------|----------------------------|
|               | 10                                      | 20         | 30       | 40       | 50       | He1      | 60                         |
| 6C70_1chainsA | -----FKHQGLVADLLPNIRVMQGVGHFMFNYYSEGKK  | FPHRIYCI   | VTLLLLLL | QYGM     |          |          |                            |
| spQ9VNB5ORCO_ | MTTSMQPSKYTGLVADLMPNIRAMKYSGLFMHNF-TGGS | AFMKKVYSSV | HLVFLLMQ | FTF      |          |          |                            |
|               | 70                                      | 80         | He2      | 90       | 100      | 110      | 120                        |
| 6C70_1chainsA | MAVNLMMESDDVDDL                         | TANTITMLF  | FLHP     | IVKMIYFP | VRSKIFYK | TLAIWNN  | PNSHPLFAE                  |
| spQ9VNB5ORCO_ | ILVNMALNAEEVNELSGN                      | TITTLFF    | THCITK   | FIYLA    | VNQKNFYR | TLNIWNQ  | VNTHPLFAE                  |
|               | 130                                     | 140        | He3      | 150      | 160      | 170      | 180                        |
| 6C70_1chainsA | SNARFHALAITKMRRLL                       | FCVAGATIF  | SVISWTG  | ITFIEDS  | -----    | PIPR     | L                          |
| spQ9VNB5ORCO_ | SDARYHSIALAKMRKLF                       | FLVMLTT    | VASATAW  | TTITFFG  | DSVKM    | VVDHETN  | SSIPVEIPRL                 |
|               | 190                                     | 200        | He4      | 210      | 220      | 230      | 240                        |
| 6C70_1chainsA | MIRTFYFPFNAMSGA                         | GHVFAL     | IYQFY    | YLVISMA  | VNSLDV   | LCFCSW   | LLFACEQLQHLKAIMK           |
| spQ9VNB5ORCO_ | PIKSFYPWNASHGM                          | FYMISFA    | FIQIYY   | VLFSMI   | HSNLC    | DMFCSW   | LIFACEQLQHLKGIMK           |
|               | 250                                     | 260        | 270      | 280      | 290      | 300      |                            |
| 6C70_1chainsA | PLMELSAT                                | -----      |          |          |          |          |                            |
| spQ9VNB5ORCO_ | PLMELSA                                 | SLDTYR     | PNNSAAL  | FRSL     | SANSK    | SELIHNEE | KDPGTDMDMSGIYSSKADWGAQFR   |
|               | 310                                     | 320        | 330      | He5      | 340      | 350      | 360                        |
| 6C70_1chainsA | -----                                   | GLTKKQ     | EMLVR    | SAIKY    | WVERH    | KHVVRL   | VTAVGDAY                   |
| spQ9VNB5ORCO_ | APSTLQSF                                | GGNGGG     | GNGLV    | NGANP    | NGLTKK   | QEMMV    | RSIAIKYWVERHKKHVRLVAAIGDTY |
|               | 370                                     | 380        | 390      | He6      | 400      | 410      | 420                        |
| 6C70_1chainsA | GVALLLHMLTTTITL                         | TLLAYQ     | ATKVN    | GVNVY    | AATV     | IGYLLY   | TLGQVFLFCIFGNRLIEES        |
| spQ9VNB5ORCO_ | GAALLHMLTSTIKL                          | TLLAYQ     | ATKING   | VNVYA    | FTTV     | GYLGY    | ALAQVFHFCIFGNRLIEES        |
|               | 430                                     | 440        | 450      | He7      | 460      | 470      | 480                        |
| 6C70_1chainsA | SSVMEAAYSCHWYD                          | GSEEA      | KTFVQ    | IVCQQ    | CQKAMS   | ISGAKFF  | TVSLDLFASVLGAVVTYF         |
| spQ9VNB5ORCO_ | SSVMEAAYSCHWYD                          | GSEEA      | KTFVQ    | IVCQQ    | CQKAMS   | ISGAKFF  | TVSLDLFASVLGAVVTYF         |
|               | 487                                     |            |          |          |          |          |                            |
| 6C70_1chainsA | MVLVQLK                                 |            |          |          |          |          |                            |
| spQ9VNB5ORCO_ | MVLVQLK                                 |            |          |          |          |          |                            |

**Figure S11.** Final pairwise alignment of *Dmel*Orco with *Ab*Orco (PDB ID:6C70) obtained from AlignMe 1.2. The sequence identity between the two sequence is 55.2%.

**Table S2. Helix definitions for *Dmel*Orco (UniProt ID: Q9VNB5)**

| Helix | Helix start | Helix end | Centre residue |
|-------|-------------|-----------|----------------|
| 1     | 40          | 66        | L54            |
| 2     | 78          | 110       | L94            |
| 3     | 122         | 159       | S146           |
| 4     | 194         | 246       | D217           |
| 5     | 335         | 383       | G260           |
| 6     | 391         | 433       | L415           |
| 7     | 436         | 486       | F461           |

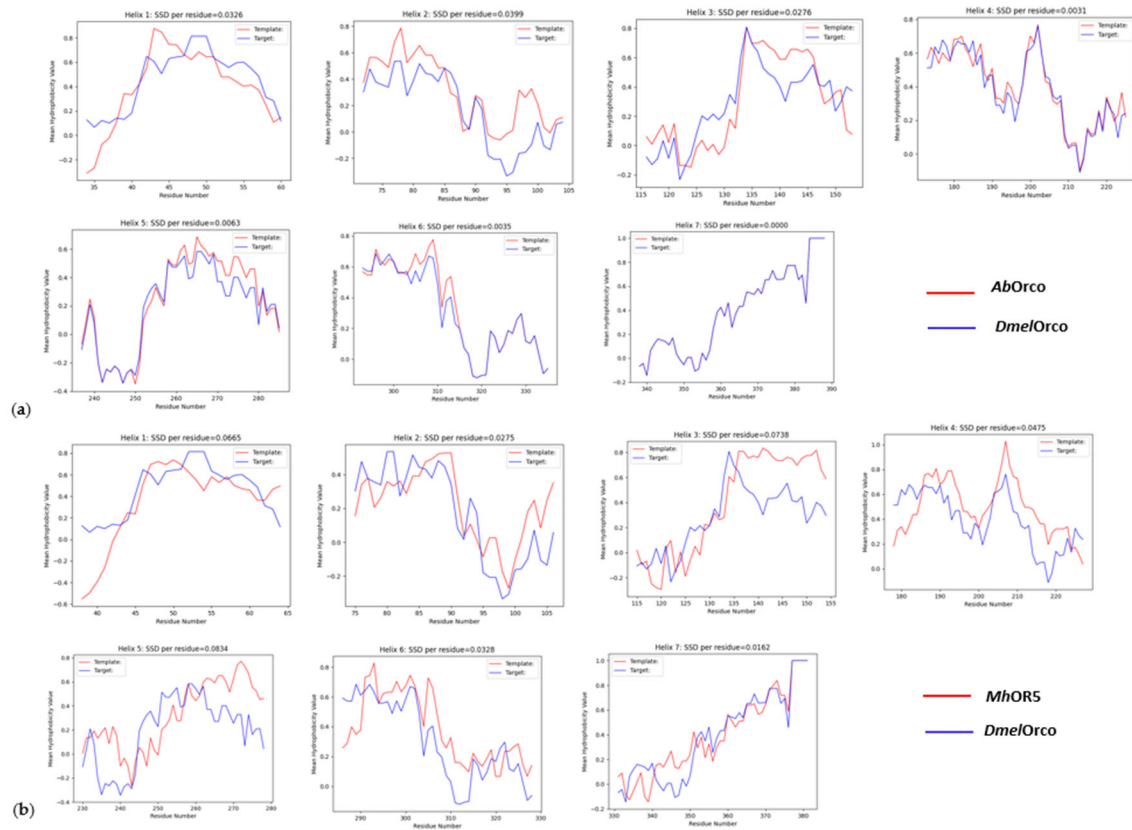

**Figure S12.** The result summary output from workflow shows the hydrophobicity plots for all the seven helices for *DmelOrco* compared with both the templates, *AbOrco* and *MhOR5*

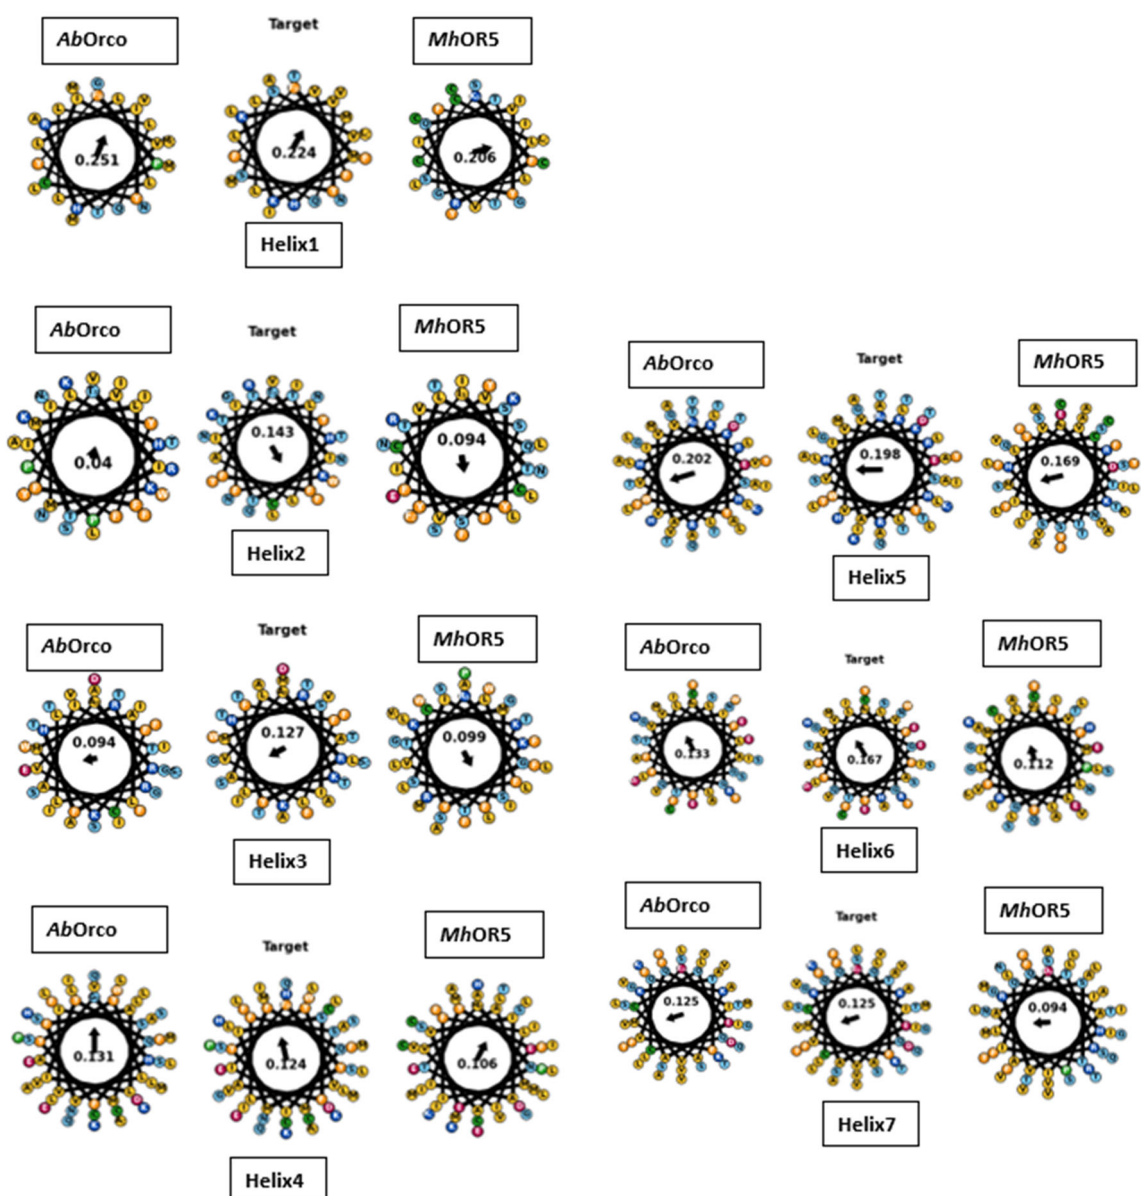

**Figure S13.** The result summary output from workflow shows the helical plots for all the seven helices for *DmelOrco* compared with both the templates, *AbOrco* and *MhOR5*. The helical moments of *DmelOrco* are better aligned to those of *AbOrco* than those of *MhOR5*.



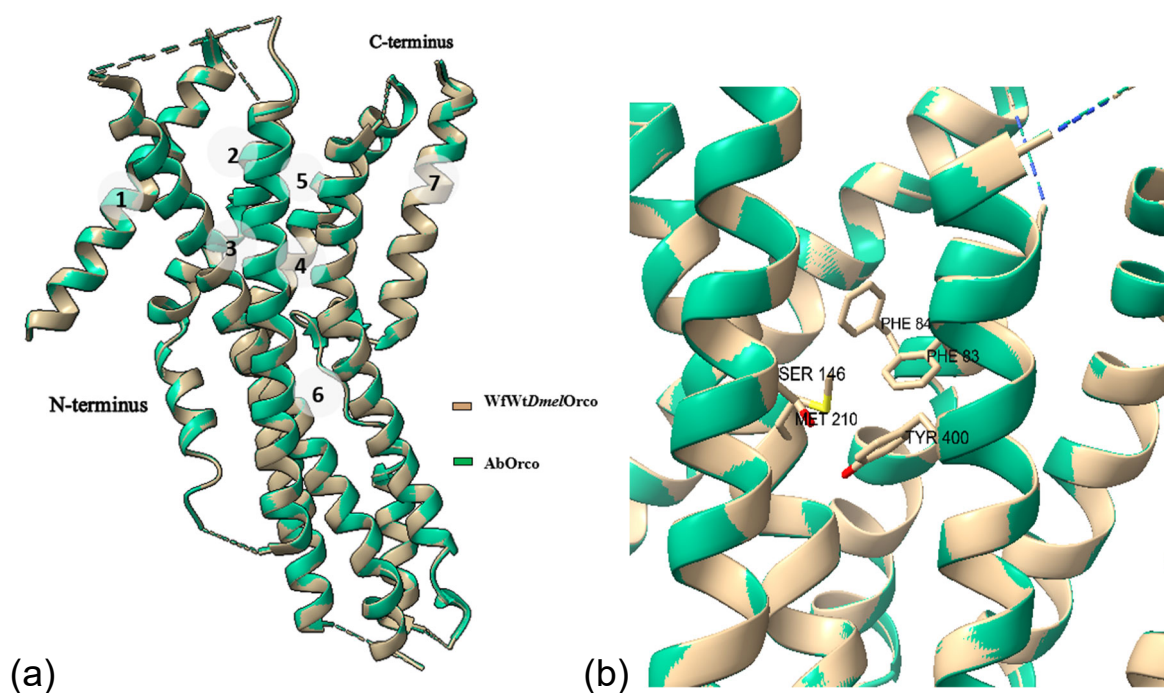

**Figure S14.** Structural overlay of predicted WfWtDmelOrco model with its template AbOrco. (PDB ID:6C70). (a) Superposed helical regions, with an RMSD of 0.1 Å, and the seven helices numbered. (b) The five residues (F83, F84, M210, S146, Y400) that were frequently identified to interact with VUAA1 in the binding site are captured.

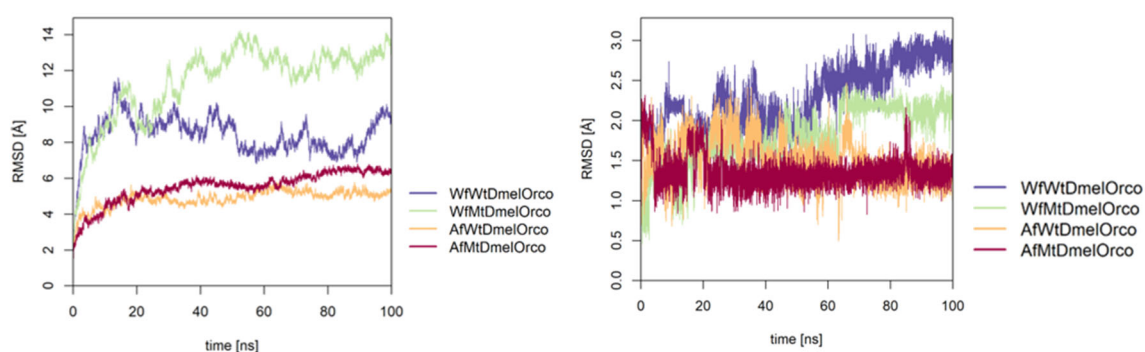

**Figure S15.** RMSD plots of all four *DmelOrco* complexes over 100 ns of MD simulations. (a) *DmelOrco* complex with bound VUAA1 and (b) the ligand VUAA1 alone.

```

>7LIG|Chains A||MhOR5|Machilis hrabei (438506)
DDYIHLRKWIKRIGIILRISGHWPFRLPHEKRNQHKSKFRQVYVSLVITLGFITCSCYIGLCLSEISIAQALNNITVTS
YFLQSCVCYVSFIINSRKLETLFNYLFENEVVGCPRGYKMSSIKTTLFRCKFVAFSLGILSFFGWLMWTLLPLAVLVVD
QTSLRFVEAWYPFDTTTSPMNEVIAIYEAVAMIFLITAPMSSDIMFCVLMIFIVEHLKCLGMAIECTLKGDATSLCNIV
DSHVKIYRTMEIVQSVYSSYFATLFFTCLAVCALAYFLAATSTSFTRVPGMVLYLMYIFLRIFLLCLLATEVAEQGLN
LCHAGYSSKLVLASDHVRSTIQAIATRAQIPLSITGARFFTVNLSFLASMAGVMLTYFIVLLQVN
>6C70|Chains A|Odorant receptor|Apocrypta bakeri (490712)
FKHQGLVADLLPNIRVMQGVGHFMFNYYSEGKKFPHRIYCIVTLLLLLLQYGMMAVNLMMESDDVDDLTTANTITMLFFL
HPIVKMIYFPVRSKIFYKTLAIWNPNNSHPLFAESNARFHALAITKMRRLLFCVAGATIFSVISWTGITFIEDSPIPRL
MIRTFYPFNAMSGAGHVFAIYQFYLVISMAVSNLSDLVFCSWLLFACEQLQHLKAIMKPLMELSATGLTKKQEMLVR
SAIKYWVERHKHVRLVTAVGDAYGVALLHMLTTTITLTLLAYQATKVNNGVNVYAATVIGYLLYTLGQVFLFCIFGNR
LIEESSVMEAAYSCHWYDGSEEAKTFVQIVCQQCQKAMSISGAKFFTVSLLDFASVLGAVVTYFMVLVQLK

```

**Figure S16.** The structure-derived sequences of the template structures. *MhOR5*: PDB ID: 7LIG and *AbOrco*: PDB ID: 6C70.

**Table S3. Helix positions for *AbOrco* (PDB ID:6C70)**

| Helix | Helix start | Helix end | Centre residue |
|-------|-------------|-----------|----------------|
| 1     | 34          | 60        | L47            |
| 2     | 72          | 104       | F88            |
| 3     | 116         | 153       | S140           |
| 4     | 173         | 225       | D196           |
| 5     | 237         | 285       | G262           |
| 6     | 293         | 335       | L317           |
| 7     | 338         | 388       | F363           |

**Table S4. Helix positions for *MhOR5* (PDB ID:7LIG)**

| Helix | Helix start | Helix end | Centre residue |
|-------|-------------|-----------|----------------|
| 1     | 38          | 64        | G51            |
| 2     | 75          | 106       | F91            |
| 3     | 115         | 154       | S140           |
| 4     | 178         | 227       | D201           |
| 5     | 230         | 278       | S255           |
| 6     | 286         | 328       | V310           |
| 7     | 331         | 381       | F356           |
